# Supplementary material for: Protective Value of Aspirin Loading Dose on Left Ventricular Remodeling After ST-Elevation Myocardial Infarction
Source: Frontiers journal article supplement (doi:10.3389/fcvm.2022.786509), 2022-03-16
Supplement: Table_1.DOCX [file Table_1.DOCX]

**Table 6. Intra-observer and inter-observer variability for measurements of GRS, GCS and GLS**

| **GCS** | Intraobserver   ICC  0.931, p < 0.001 |
| --- | --- |
| Interobserver  ICC  0.922, p < 0.001 |
| **GLS** | Intraobserver   ICC 0.928, p < 0.001 |
| Interobserver   ICC 0.927, p < 0.001 |
| **GRS** | Intraobserver   ICC  0.943, p < 0.001 |
| Interobserver   ICC  0.925, p < 0.001 |
